# Supplementary material for: Phenanthroimidazole derivatives with minor structural differences: crystalline polymorphisms, different molecular packing, and totally different mechanoluminescence
Source: Royal Society of Chemistry journal article supplement (doi:10.1039/c9tc05218f), 2019-01-01
Supplement: c9tc05218f1.pdf [file c9tc05218f1.pdf]

## *Electronic Supplementary Information*

### ***Table of Contents***

#### **1. General experimental procedures**

Characterization

#### **2. Synthesis**

Scheme S1. The synthetic route of tPTI-Bpin and PTI-Bpin.

#### **3. Figures and Tables**

**Chart S1.** Molecular structures of previously reported ML-active polymorphs.

**Fig. S1** (a) UV and PL spectra of tPTI-Bpin and PTI-Bpin in THF solution. (b) Fluorescence decay of tPTI-Bpin and PTI-Bpin in different states.

**Fig. S2** The TGA (Thermogravimetric Analysis) curves of PTI-Bpin and tPTI-Bpin.

**Fig. S3** Crystal molecular packing of tPTI-B1, tPTI-B2 and PTI-B.

**Fig. S4** Single molecule conformations of tPTI-B1, tPTI-B2 and PTI-B in the crystals.

**Table S1.** Summarization of the torsion angles and intramolecular interactions in single molecules of tPTI-B1, tPTI-B2 and PTI-B.

**Table S2.** Summarization of intermolecular interactions in different molecular dimers derived from the unit cell of tPTI-B1.

**Table S3.** Summarization of intermolecular interactions in different molecular dimers derived from the unit cell of tPTI-B2.

**Table S4.** Summarization of intermolecular interactions in different molecular dimers derived from the unit cell of PTI-B.

**Table S5.** Structure data of crystals tPTI-B1, tPTI-B2 and PTI-B.

#### **4. Structure Information**

**Fig. S5**  $^1\text{H}$  NMR spectrum of tPTI-Bpin conducted in  $\text{CD}_2\text{Cl}_2$ .

**Fig. S6**  $^{13}\text{C}$  NMR spectrum of tPTI-Bpin conducted in  $\text{CD}_2\text{Cl}_2$ .

**Fig. S7**  $^1\text{H}$  NMR spectrum of PTI-Bpin conducted in  $\text{CD}_2\text{Cl}_2$ .

**Fig. S8**  $^{13}\text{C}$  NMR spectrum of PTI-Bpin conducted in  $\text{CD}_2\text{Cl}_2$ .

**Fig. S9**  $^1\text{H}$  NMR spectrum of tPTI-Br conducted in  $\text{CDCl}_3$ .

**Fig. S10**  $^1\text{H}$  NMR spectrum of PTI-Br conducted in  $\text{CDCl}_3$ .

**Fig. S11** HRMS spectrum of tPTI-Bpin.

**Fig. S12** HRMS spectrum of PTI-Bpin.

## 1. General experimental procedures

**Characterization:**  $^1\text{H}$  and  $^{13}\text{C}$  NMR spectra were recorded on a 400 MHz Varian Mercury, using  $\text{CD}_2\text{Cl}_2$  or  $\text{THF-}d_8$  as the solvent. High-resolution mass spectra were measured on an LTQ-Orbitrap Elite high-resolution mass spectrometer (Thermo-Fisher Scientific, Waltham, MA, USA) equipped with an electrospray ionization (ESI) source and a Dionex Ultimate 3000 UPLC system (Thermo-Fisher Scientific, Waltham, MA, USA). Mass spectra were measured on a ZAB 3F-HF mass spectrophotometer. Elemental analyses of carbon, hydrogen and nitrogen were performed on a Perkin-Elmer microanalyzer. PL spectra were recorded by a Hitachi F-4600 fluorescence spectrophotometer. The ML spectra were measured on a spectrometer of Acton SP2750 with CCD (SPEC-10, Princeton) as a power detector. Absolute photoluminescence quantum yield (PLQY) and fluorescence decay were recorded by an Edinburgh FLS980 spectrometer. The powder X-ray diffraction patterns were measured on Rigaku MiniFlex 600 at 25 °C at 40 KV and 40 mA at a scan rate of  $10^\circ (2\theta)/\text{min}$  (scan range: 5-60°). The single-crystal X-ray diffraction data were recorded by a Bruker Smart Apex II CCD diffractometer. The CCDC numbers of tPTI-B1, tPTI-B2 and PTI-B are 1948492, 1948484 and 1948485 respectively. Thermogravimetric analysis were carried out on TG 209 F1 of Thermogravimetric Analyzer under nitrogen at heating rate of  $10^\circ\text{C min}^{-1}$ . Differential scanning calorimetry were performed on NETZSCHDSC 200 PC instrument from room temperature to 250 °C at a heating rate of  $10^\circ\text{C}/\text{min}$  under nitrogen. The Gaussian 09 program was utilized to perform the TD-DFT calculations. The ground state ( $S_0$ ) geometry was obtained from the single crystal structure and no further geometry optimization was conducted in order to maintain the specific molecular configuration and corresponding intermolecular locations.

## 2. Synthesis

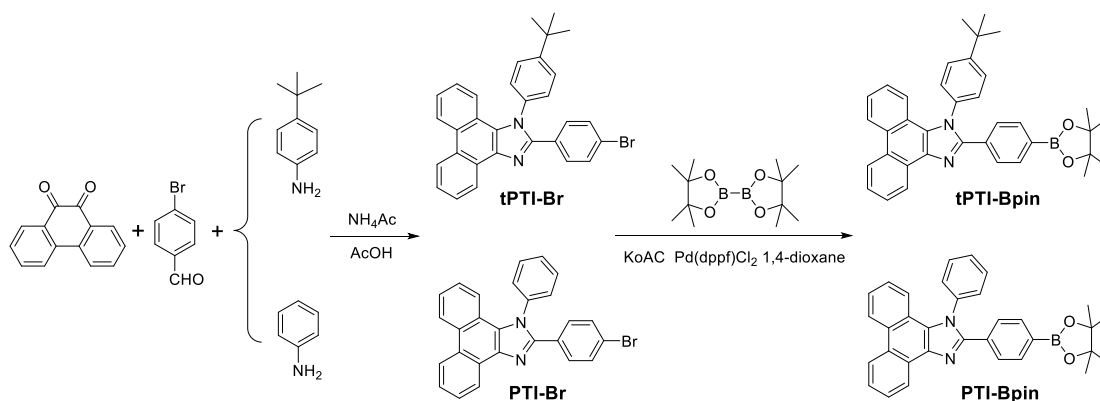

**Scheme S1.** The synthetic routes of tPTI-Bpin and PTI-Bpin.

**tPTI-Br:** To a round-bottom flask fitted with a reflux condenser, was added 9,10-phenanthrene-9,10-dione (4.17 g, 20 mmol), 4-bromobenzaldehyde (1.90 g, 10 mmol), 4-tert-butylaniline (1.60 mL, 10 mmol), ammonium acetate (4.63 g, 60 mmol) and acetic acid (50 mL). The resultant solution was stirred under nitrogen atmosphere at refluxing temperature for 4 h. After the reaction completed, the mixture was cooled to room temperature and quenched with a large amount of water, after stirring for 30 mins, the

mixture was filtered and washed with a small amount of methanol to afford a crude product. The crude product was purified by column chromatography (eluent:petroleum ether/dichloromethane = 1/3) to give the pure compound of tPTI-Br as a light yellow solid (4.06 g, 81%). <sup>1</sup>H NMR (400 MHz, CDCl<sub>3</sub>, δ): 8.85-8.83 (d, *J* = 8 Hz 1H, Ar-H), 8.77-8.75 (d, *J* = 8 Hz, 1H, Ar-H), 8.71-8.69 (d, *J* = 8 Hz, 1H, Ar-H), 7.76-7.72 (m, 1H, Ar-H), 7.67-7.60 (m, 3H, Ar-H), 7.53-7.49 (m, 1H, Ar-H), 7.47-7.40 (m, 6H, Ar-H), 7.28-7.24 (m, 1H, Ar-H), 7.19-7.17 (d, *J* = 8 Hz, 1H, Ar-H), 1.45 (s, 9H, -tBu). MS (ESI), *m/z*: 504.01, calcd for C<sub>20</sub>H<sub>18</sub>NO<sub>2</sub>Br: 504.12.

**PTT-Br:** To a round-bottom flask fitted with a reflux condenser, was added 9,10-phenanthrene-1,10-dione (4.17 g, 20 mmol), 4-bromobenzaldehyde (1.90 g, 10 mmol), aniline (0.91 mL, 10 mmol), ammonium acetate (4.63 g, 60 mmol) and acetic acid (50 mL). The resultant solution was stirred under nitrogen atmosphere at refluxing temperature for 4 h. After the reaction completed, the mixture was cooled to room temperature and quenched with a large amount of water, after stirring for 30 mins, the mixture was filtered and washed with a small amount of methanol to afford a crude product. The crude product was purified by column chromatography (eluent:petroleum ether/dichloromethane = 1/3) to give the pure compound of PTI-Br as a light yellow solid (3.51 g, 78%). <sup>1</sup>H NMR (400 MHz, CDCl<sub>3</sub>, δ): 8.85-8.84 (d, *J* = 4 Hz 1H, Ar-H), 8.78-8.76 (d, *J* = 8 Hz, 1H, Ar-H), 8.71-8.70 (d, *J* = 4 Hz, 1H, Ar-H), 7.75-7.73 (m, 1H, Ar-H), 7.67-7.61 (m, 4H, Ar-H), 7.53-7.50 (m, 3H, Ar-H), 7.46-7.41 (m, 4H, Ar-H), 7.27-7.26 (m, 1H, Ar-H), 7.18-7.16 (d, *J* = 8 Hz, 1H, Ar-H). MS (ESI), *m/z*: 447.95, calcd for C<sub>20</sub>H<sub>18</sub>NO<sub>2</sub>Br: 448.06.

**tPTT-Bpin:** tPTI-Br (4.50 g, 9 mmol), bis(pinacolato)diboron (3.93 g, 13.5 mmol), potassium acetate (3.10 g, 31.5 mmol), and Pd(dppf)<sub>2</sub>Cl<sub>2</sub> (0.33 g, 0.45 mmol) in anaerobic 1,4-dioxane (80 mL) were refluxed under nitrogen for 12 h. After the reaction completed, the mixture was cooled to room temperature and then water (100 mL) was added, and extracted with dichloromethane. The organic layer was dried over anhydrous Na<sub>2</sub>SO<sub>4</sub>. The crude product was purified by column chromatography (eluent:petroleum ether/dichloromethane = 1/4) to give the pure compound of tPTI-Bpin as a white solid (1.91 g, 39%). <sup>1</sup>H NMR (400 MHz, CD<sub>2</sub>Cl<sub>2</sub>, δ): 8.85-8.83 (d, *J* = 8 Hz 1H, Ar-H), 8.78-8.76 (d, *J* = 8 Hz, 1H, Ar-H), 8.73-8.71 (d, *J* = 8 Hz, 1H, Ar-H), 7.78-7.71 (m, 3H, Ar-H), 7.69-7.63 (m, 5H, Ar-H), 7.53-7.49 (m, 1H, Ar-H), 7.46-7.44 (d, *J* = 8 Hz, 2H, Ar-H), 7.30-7.27 (m, 1H, Ar-H), 7.22-7.20 (d, *J* = 8 Hz, 1H, Ar-H), 1.47 (s, 9H, -tBu), 1.35 (s, 12H, -CH<sub>3</sub>). <sup>13</sup>C NMR (100 MHz, CD<sub>2</sub>Cl<sub>2</sub>, δ): 153.87, 150.88, 137.69, 136.32, 134.68, 133.58, 129.47, 128.88, 128.80, 128.73, 128.54, 127.68, 127.65, 127.48, 126.68, 125.90, 125.28, 124.36, 123.55, 122.86, 121.38, 84.33, 35.30, 31.53, 25.07. MS (ESI), *m/z*: 552.17, calcd for C<sub>37</sub>H<sub>37</sub>BN<sub>2</sub>O<sub>2</sub>: 552.29. HRMS (ESI), *m/z*: [M<sup>+</sup>] 553.3006, calcd for C<sub>37</sub>H<sub>37</sub>BN<sub>2</sub>O<sub>2</sub>: 553.3027. Elemental analyses for C<sub>37</sub>H<sub>37</sub>BN<sub>2</sub>O<sub>2</sub>: C, 80.43; H, 6.75; N, 5.07. Found: C, 79.95; H, 6.98; N, 4.98. [CCDC 1948492, 1948484]

**PTT-Bpin:** PTI-Br (5.40 g, 12 mmol), bis(pinacolato)diboron (3.66 g, 14.4 mmol), potassium acetate (4.10 g, 42 mmol), and Pd(dppf)<sub>2</sub>Cl<sub>2</sub> (0.44 g, 0.60 mmol) in anaerobic 1,4-dioxane (100 mL) were

refluxed under nitrogen for 12 h. After the reaction completed, the mixture was cooled to room temperature and then water (150 mL) was added, and extracted with dichloromethane. The organic layer was dried over anhydrous Na<sub>2</sub>SO<sub>4</sub>. The crude product was purified by column chromatography (eluent:petroleum ether/dichloromethane = 1/4) to give the pure compound of tPTI-Bpin as a white solid (2.80 g, 47%). <sup>1</sup>H NMR (400 MHz, CD<sub>2</sub>Cl<sub>2</sub>, δ): 8.88-8.86 (d, *J* = 8 Hz 1H, Ar-H), 8.77-8.75 (d, *J* = 8 Hz, 1H, Ar-H), 8.72-8.70 (d, *J* = 8 Hz, 1H, Ar-H), 7.77-7.74 (m, 3H, Ar-H), 7.66-7.60 (m, 6H, Ar-H), 7.53-7.51 (m, 3H, Ar-H), 7.28-7.24 (m, 2H, Ar-H), 1.36 (s, 12H, -CH<sub>3</sub>). <sup>13</sup>C NMR (100 MHz, CD<sub>2</sub>Cl<sub>2</sub>, δ): 150.94, 139.08, 137.77, 134.69, 133.48, 130.51, 130.20, 129.48, 129.45, 128.85, 128.72, 128.56, 127.67, 127.66, 126.70, 125.95, 125.33, 124.40, 123.56, 123.41, 122.88, 121.29, 84.32, 25.08. MS (ESI), *m/z*: 496.12, calcd for C<sub>33</sub>H<sub>29</sub>BN<sub>2</sub>O<sub>2</sub>: 496.23. HRMS (ESI), *m/z*: [M<sup>+</sup>] 497.2383, calcd for C<sub>33</sub>H<sub>29</sub>BN<sub>2</sub>O<sub>2</sub>: 497.2401. Elemental analyses for C<sub>33</sub>H<sub>29</sub>BN<sub>2</sub>O<sub>2</sub>: C, 79.84; H, 5.89; N, 5.64. Found: C, 79.70; H, 6.04; N, 5.86. [CCDC 1948485]

### 3. Figures and Tables

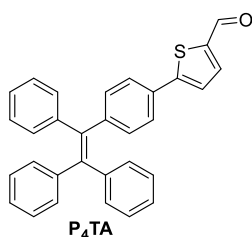

*Chem. Sci.*, 2015, **6**, 3236-3241

SC<sub>g</sub>: λ<sub>em</sub> = 498 nm, PLQY = 52%, λ<sub>ML</sub> = 517 nm  
P2(1), Monoclinic, Noncentrosymmetric

SC<sub>b</sub>: λ<sub>em</sub> = 476 nm, PLQY = 36%  
P2(1), Monoclinic, Noncentrosymmetric

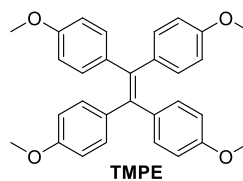

*Mater. Horiz.*, 2016, **3**, 220-225

C<sub>p</sub>: λ<sub>em</sub> = 429 nm, PLQY = 69.9%, λ<sub>ML</sub> = 460 nm  
P21(c), Monoclinic, Centrosymmetric

C<sub>c</sub>: λ<sub>em</sub> = 420 nm, PLQY = 67.4%  
C2, Monoclinic, Noncentrosymmetric

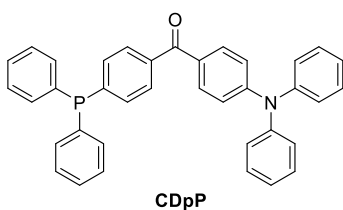

*Chem. Sci.*, 2018, **9**, 5787-5794

CDpP-B: λ<sub>em</sub> = 473 nm, PLQY = 31%, λ<sub>ML</sub> = 473 nm  
P21/n, Monoclinic, Centrosymmetric

CDpP-G: λ<sub>em</sub> = 504 nm, PLQY = 26%, λ<sub>ML</sub> = 504 nm  
C<sub>c</sub>, Monoclinic, Noncentrosymmetric

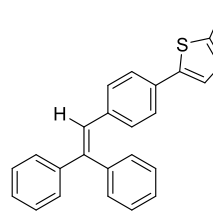

*Mater. Chem. Front.*, 2019, **3**, 32-38

P1: λ<sub>em</sub> = 440 nm, PLQY = 33.3%, λ<sub>ML</sub> = 453 nm  
P1, Triclinic, Noncentrosymmetric

P2: λ<sub>em</sub> = 473 nm, PLQY = 25.5%,  
P212121, Orthorhombic, Centrosymmetric

**Chart S1.** Molecular structures of previously reported ML-active polymorphs.

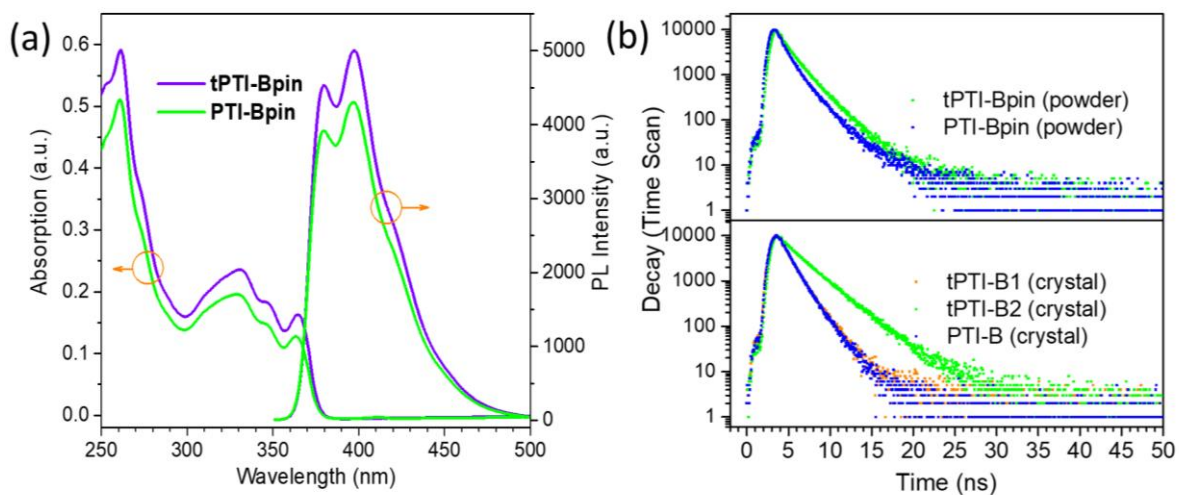

**Fig. S1** (a) UV and PL spectra of tPTI-Bpin and PTI-Bpin in THF solution. ( $c = 10^{-5}$  M) (b) Fluorescence decay of tPTI-Bpin and PTI-Bpin in different states.

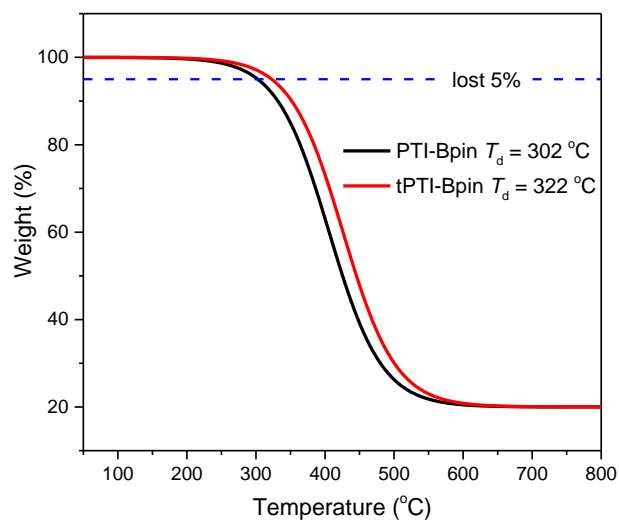

**Fig. S2** The TGA (Thermogravimetric Analysis) curves of PTI-Bpin and tPTI-Bpin.

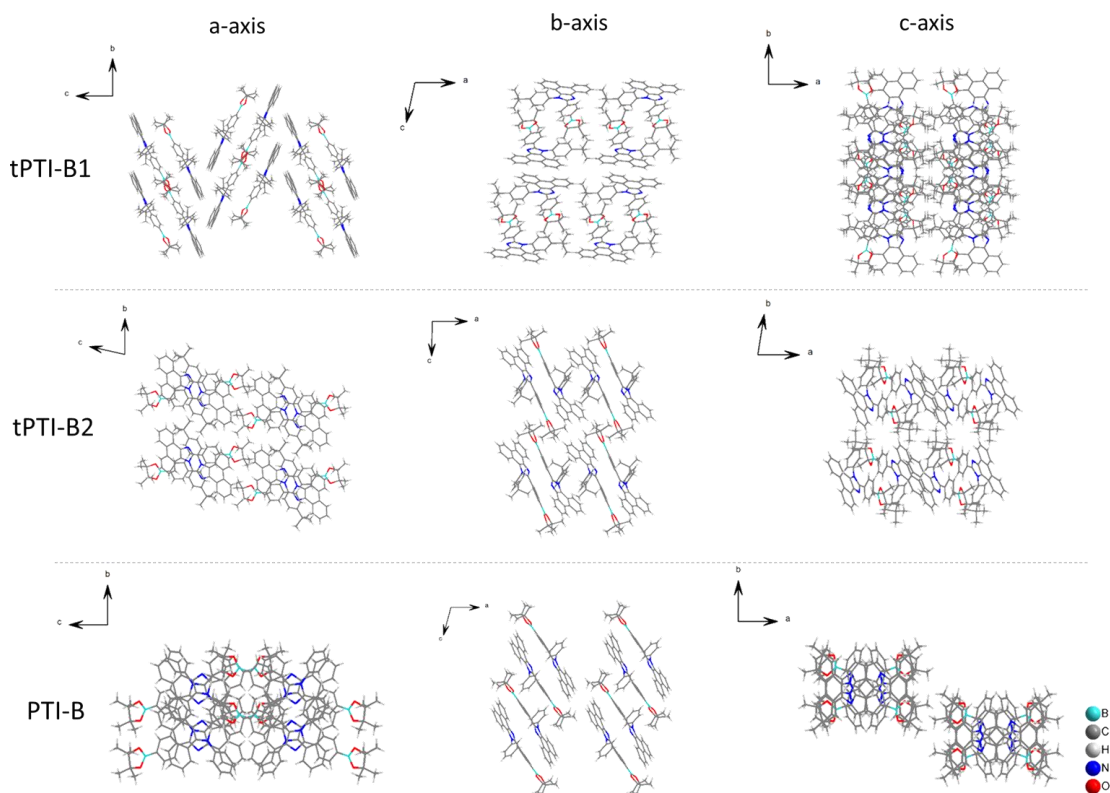

**Fig. S3** Crystal molecular packing of tPTI-B1, tPTI-B2 and PTI-B.

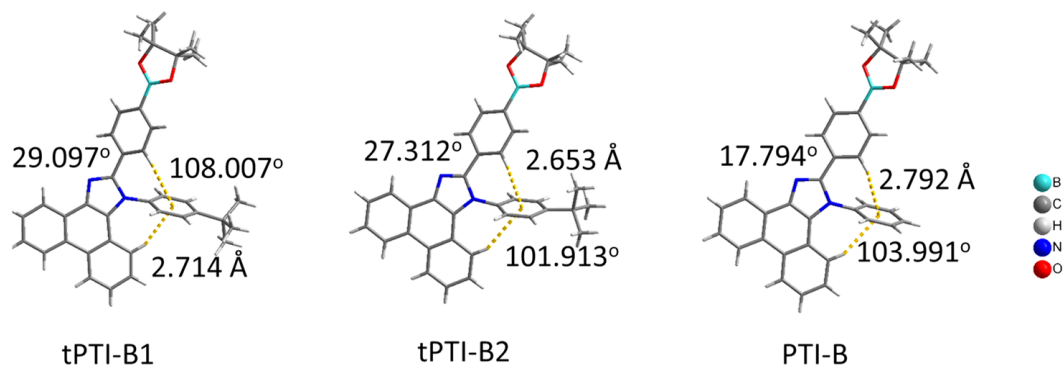

**Fig. S4** Single molecule conformations of tPTI-B1, tPTI-B2 and PTI-B in the crystals.

**Table S1.** Summarization of the torsion angles and intramolecular interactions in single molecules of tPTI-B1, tPTI-B2 and PTI-B.

|         | Torsion angle 1 | Torsion angle 2 | C-H... $\pi$<br>interaction 1 | C-H... $\pi$<br>interaction 2 |
|---------|-----------------|-----------------|-------------------------------|-------------------------------|
| tPTI-B1 | 29.097°         | 108.007°        | 3.042 Å                       | 2.714 Å                       |
| tPTI-B2 | 27.312°         | 101.913°        | 2.653 Å                       | 3.105 Å                       |
| PTI-B   | 17.794°         | 103.991°        | 2.792 Å                       | 2.863 Å                       |

**Table S2.** Summarization of intermolecular interactions in different molecular dimers derived from the unit cell of tPTI-B1.

| Dimer-1                    | Orientation of Interaction | d /Å <sup>a</sup> | Number(4)  |
|----------------------------|----------------------------|-------------------|------------|
|                            | 1 C-H... $\pi$             | 3.593             | 2          |
|                            | 2 C-H... $\pi$             | 3.633             | 2          |
| Orientation of Interaction |                            | d /Å <sup>a</sup> | Number(8)  |
|                            | 1 C-H...O                  | 2.663             | 2          |
|                            | 2 C-H...O                  | 3.029             | 2          |
|                            | 3 C-H...O                  | 3.709             | 2          |
|                            | 4 C-H...O                  | 3.987             | 2          |
| Dimer -2                   | Orientation of Interaction | d /Å <sup>a</sup> | Number(7)  |
|                            | 1 C-H... $\pi$             | 2.693             | 1          |
|                            | 2 C-H... $\pi$             | 3.312             | 1          |
|                            | 3 C-H... $\pi$             | 3.420             | 1          |
|                            | 4 C-H... $\pi$             | 3.425             | 1          |
|                            | 5 C-H... $\pi$             | 3.533             | 1          |
|                            | 6 C-H... $\pi$             | 3.780             | 1          |
|                            | 7 C-H... $\pi$             | 3.971             | 1          |
| Orientation of Interaction |                            | d /Å <sup>a</sup> | Number(7)  |
|                            | 1 C-H...N                  | 2.746             | 1          |
|                            | 2 C-H...N                  | 2.916             | 1          |
|                            | 3 C-H...N                  | 2.979             | 1          |
|                            | 4 C-H...N                  | 3.543             | 1          |
|                            | 5 C-H...N                  | 3.594             | 1          |
|                            | 6 C-H...N                  | 3.623             | 1          |
|                            | 7 C-H...N                  | 3.975             | 1          |
| Dimer -3                   | Orientation of Interaction | d /Å <sup>a</sup> | Number(11) |
|                            | 1 C-H... $\pi$             | 3.136             | 1          |
|                            | 2 C-H... $\pi$             | 3.300             | 1          |
|                            | 3 C-H... $\pi$             | 3.394             | 1          |
|                            | 4 C-H... $\pi$             | 3.404             | 1          |
|                            | 5 C-H... $\pi$             | 3.445             | 1          |
|                            | 6 C-H... $\pi$             | 3.502             | 1          |
|                            | 7 C-H... $\pi$             | 3.525             | 1          |
|                            | 8 C-H... $\pi$             | 3.539             | 1          |
|                            | 9 C-H... $\pi$             | 3.802             | 1          |
|                            | 10 C-H... $\pi$            | 3.839             | 1          |
|                            | 11 C-H... $\pi$            | 3.932             | 1          |
| Orientation of Interaction |                            | d /Å <sup>a</sup> | Number(4)  |
|                            | 1 C-H...N                  | 3.207             | 1          |
|                            | 2 C-H...N                  | 3.451             | 1          |
|                            | 3 C-H...N                  | 3.818             | 1          |
|                            | 4 C-H...N                  | 3.900             | 1          |

**Table S3.** Summarization of intermolecular interactions in different molecular dimers derived from the unit cell of tPTI-B2.

| Dimer-1 | Orientation of Interaction | d /Å <sup>a</sup> | Number(16) |   |
|---------|----------------------------|-------------------|------------|---|
|         | 1                          | C-H... $\pi$      | 2.686      | 1 |
|         | 2                          | C-H... $\pi$      | 2.699      | 1 |
|         | 3                          | C-H... $\pi$      | 2.998      | 2 |
|         | 4                          | C-H... $\pi$      | 3.284      | 2 |
|         | 5                          | C-H... $\pi$      | 3.510      | 2 |
|         | 6                          | C-H... $\pi$      | 3.770      | 2 |
|         | 7                          | C-H... $\pi$      | 3.863      | 1 |
|         | 8                          | C-H... $\pi$      | 3.879      | 1 |
|         | 9                          | C-H... $\pi$      | 3.903      | 2 |
|         | 10                         | C-H... $\pi$      | 3.996      | 2 |
|         | Orientation of Interaction | d /Å <sup>a</sup> | Number(10) |   |
|         | 1                          | C-H...N           | 3.326      | 2 |
|         | 2                          | C-H...N           | 3.417      | 2 |
|         | 3                          | C-H...N           | 3.560      | 2 |
|         | 4                          | C-H...N           | 3.649      | 2 |
|         | 5                          | C-H...N           | 3.692      | 2 |
| Dimer-2 | Orientation of Interaction | d /Å <sup>a</sup> | Number(18) |   |
|         | 1                          | C-H... $\pi$      | 2.925      | 1 |
|         | 2                          | C-H... $\pi$      | 2.944      | 1 |
|         | 3                          | C-H... $\pi$      | 3.157      | 2 |
|         | 4                          | C-H... $\pi$      | 3.175      | 2 |
|         | 5                          | C-H... $\pi$      | 3.228      | 1 |
|         | 6                          | C-H... $\pi$      | 3.264      | 1 |
|         | 7                          | C-H... $\pi$      | 3.311      | 2 |
|         | 8                          | C-H... $\pi$      | 3.441      | 2 |
|         | 9                          | C-H... $\pi$      | 3.656      | 2 |
|         | 10                         | C-H... $\pi$      | 3.822      | 2 |
|         | 11                         | C-H... $\pi$      | 3.953      | 2 |
|         | Orientation of Interaction | d /Å <sup>a</sup> | Number(2)  |   |
|         | 1                          | C-H...N           | 3.359      | 2 |



**Table S4.** Summarization of intermolecular interactions in different molecular dimers derived from the unit cell of PTI-B.

| Dimer-1                    | Orientation of Interaction | d /Å <sup>a</sup> | Number(2)  |
|----------------------------|----------------------------|-------------------|------------|
| 1                          | $\pi \dots \pi$            | 3.793             | 2          |
| Orientation of Interaction |                            | d /Å <sup>a</sup> | Number(12) |
| 1                          | C-H... $\pi$               | 3.206             | 2          |
| 2                          | C-H... $\pi$               | 3.434             | 2          |
| 3                          | C-H... $\pi$               | 3.504             | 2          |
| 4                          | C-H... $\pi$               | 3.576             | 2          |
| 5                          | C-H... $\pi$               | 3.703             | 2          |
| 6                          | C-H... $\pi$               | 3.817             | 2          |
| Orientation of Interaction |                            | d /Å <sup>a</sup> | Number(4)  |
| 1                          | C-H...O                    | 3.190             | 2          |
| 2                          | C-H...O                    | 3.253             | 2          |
| Orientation of Interaction |                            | d /Å <sup>a</sup> | Number(4)  |
| 1                          | C-H...N                    | 2.556             | 2          |
| 2                          | C-H...N                    | 3.722             | 2          |
| Dimer-2                    | Orientation of Interaction | d /Å <sup>a</sup> | Number(6)  |
| 1                          | C-H... $\pi$               | 3.285             | 2          |
| 2                          | C-H... $\pi$               | 3.691             | 2          |
| 3                          | C-H... $\pi$               | 3.704             | 2          |
| Orientation of Interaction |                            | d /Å <sup>a</sup> | Number(4)  |
| 1                          | C-H...O                    | 3.012             | 2          |
| 2                          | C-H...O                    | 3.709             | 2          |
| Orientation of Interaction |                            | d /Å <sup>a</sup> | Number(8)  |
| 1                          | C-H...N                    | 2.750             | 2          |
| 2                          | C-H...N                    | 3.070             | 2          |
| 3                          | C-H...N                    | 3.093             | 2          |
| 4                          | C-H...N                    | 3.615             | 2          |

**Table S5.** Structure data of crystals tPTI-B1, tPTI-B2 and PTI-B.

| Name                               | tPTI-B1                                                        | tPTI-B2                                                          | PTI-B                                                          |
|------------------------------------|----------------------------------------------------------------|------------------------------------------------------------------|----------------------------------------------------------------|
| Empirical formula                  | C <sub>37</sub> H <sub>37</sub> BN <sub>2</sub> O <sub>2</sub> | C <sub>37</sub> H <sub>37</sub> BN <sub>2</sub> O <sub>2</sub>   | C <sub>33</sub> H <sub>29</sub> BN <sub>2</sub> O <sub>2</sub> |
| Wavelength (Å)                     | 0.71073                                                        | 0.71073                                                          | 1.54184                                                        |
| Crystal system                     | monoclinic                                                     | triclinic                                                        | monoclinic                                                     |
| Space group                        | <i>P</i> 2 <sub>1</sub> / <i>c</i> (14)                        | <i>P</i> -1 (2)                                                  | <i>C</i> 2/ <i>c</i> (15)                                      |
| Unit cell angles (°)               | $\alpha = 90$<br>$\beta = 102.12(1)$<br>$\gamma = 90$          | $\alpha = 77.44(0)$<br>$\beta = 89.44(0)$<br>$\gamma = 80.78(0)$ | $\alpha = 90$<br>$\beta = 104.84(0)$<br>$\gamma = 90$          |
| Unit cell length (Å)               | a = 12.265(4)<br>b = 9.760(3)<br>c = 26.828(9)                 | a = 10.253(19)<br>b = 10.807(2)<br>c = 14.406(3)                 | a = 28.078(7)<br>b = 9.992(2)<br>c = 20.671(4)                 |
| Unit cell volume (Å <sup>3</sup> ) | 3139.91(441)                                                   | 1537.39(141)                                                     | 5606.41(298)                                                   |
| Z                                  | 4                                                              | 2                                                                | 8                                                              |
| Density (g/cm <sup>3</sup> )       | 1.168                                                          | 1.193                                                            | 1.214                                                          |
| F(000)                             | 1176.0                                                         | 588.0                                                            | 2160.0                                                         |
| CCDC number                        | 1948492                                                        | 1948484                                                          | 1948485                                                        |

#### 4. Structure Information

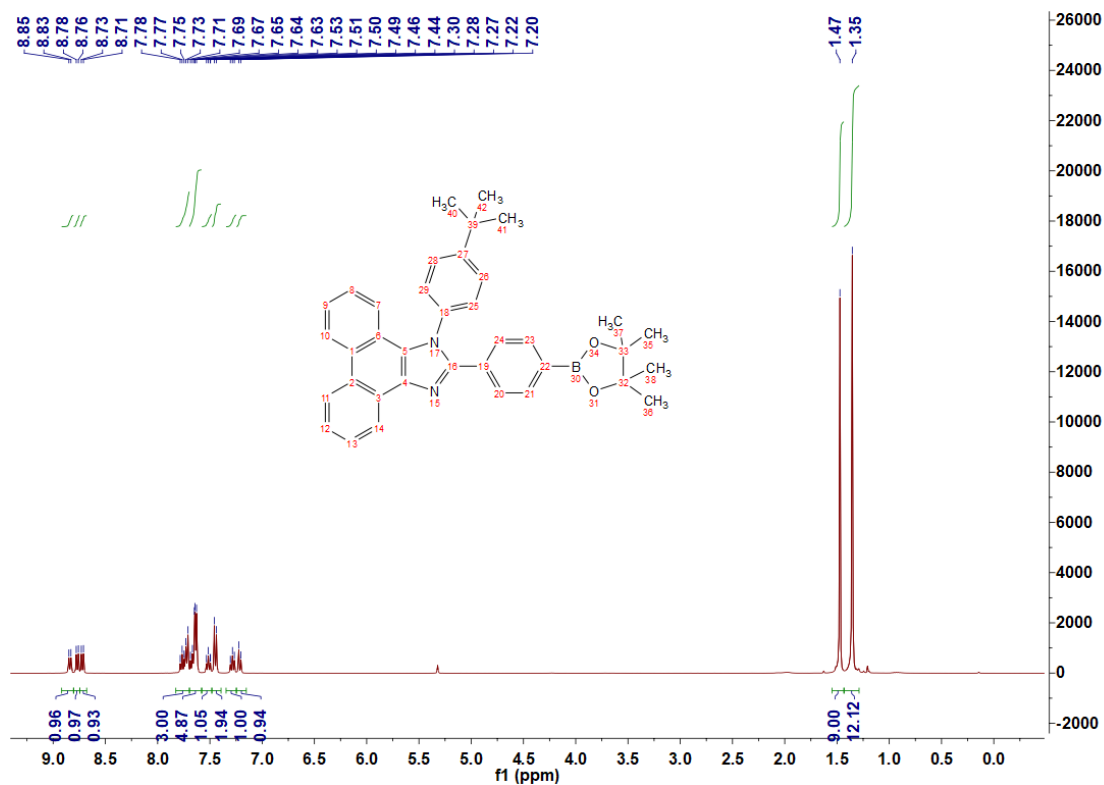

Fig. S5 <sup>1</sup>H NMR spectrum of tPTI-Bpin conducted in CD<sub>2</sub>Cl<sub>2</sub>.

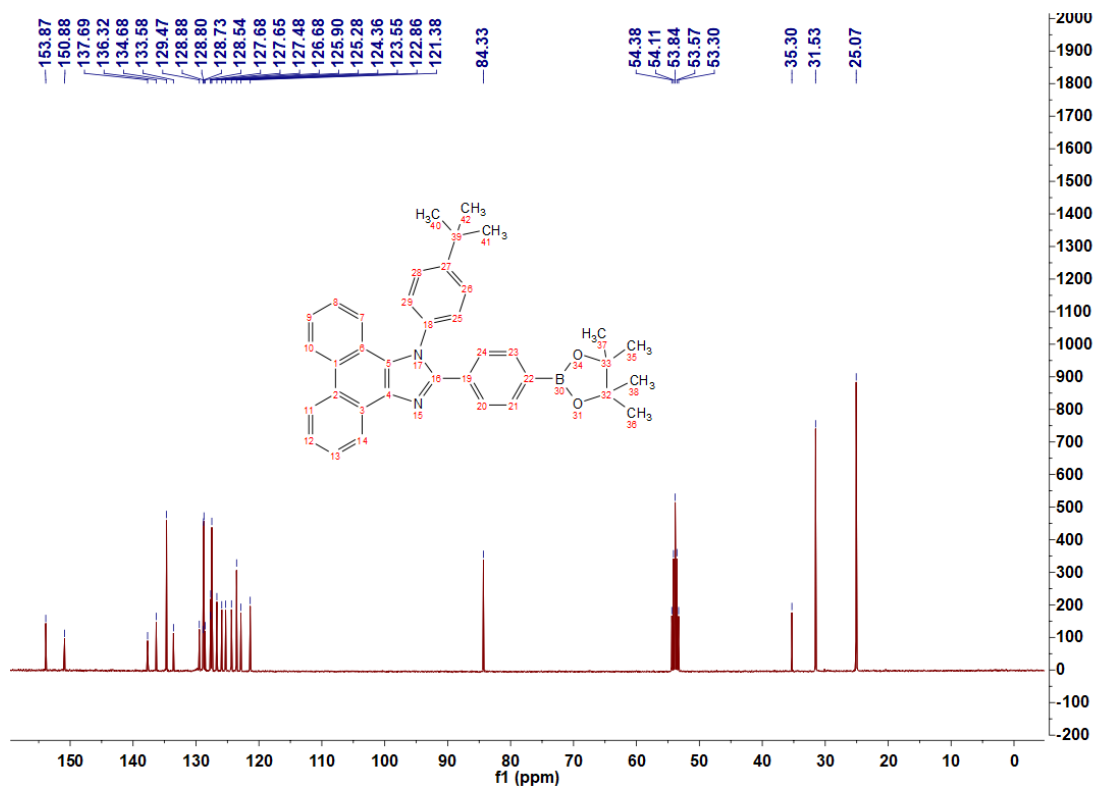

Fig. S6 <sup>13</sup>C NMR spectrum of tPTI-Bpin conducted in CD<sub>2</sub>Cl<sub>2</sub>.

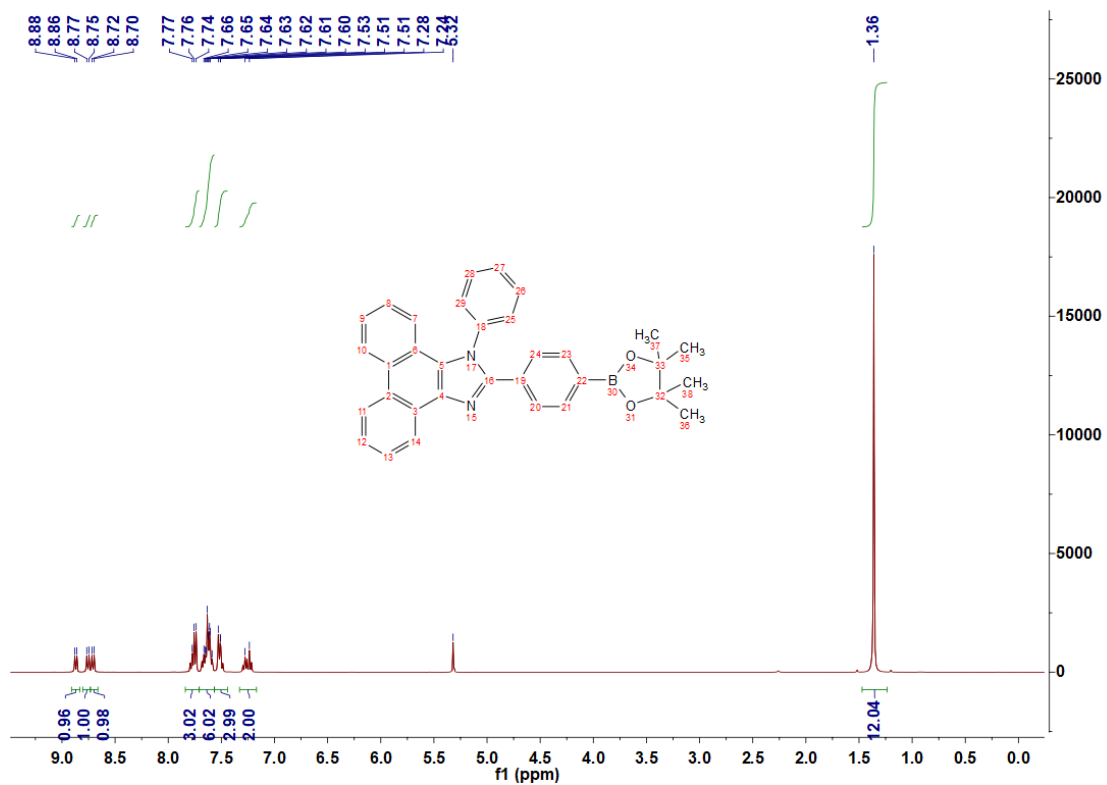

Fig. S7 <sup>1</sup>H NMR spectrum of PTI-Bpin conducted in CD<sub>2</sub>Cl<sub>2</sub>.

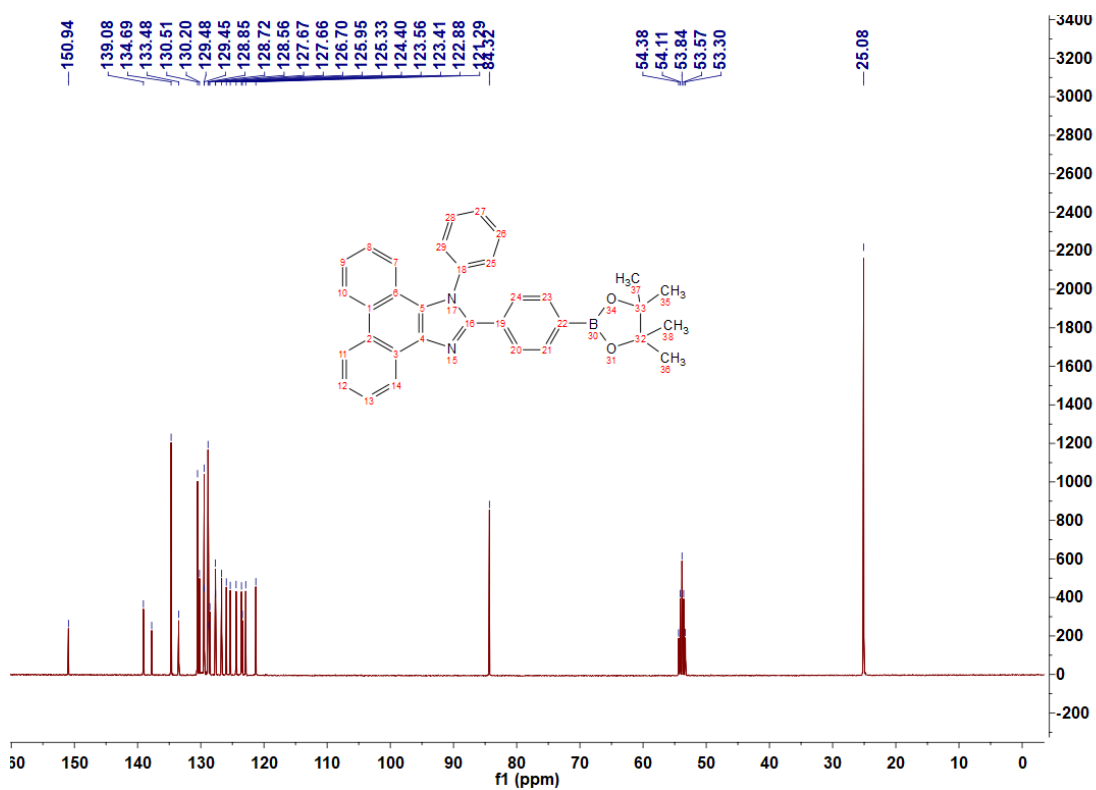

Fig. S8 <sup>13</sup>C NMR spectrum of tPTI-Bpin conducted in CD<sub>2</sub>Cl<sub>2</sub>.

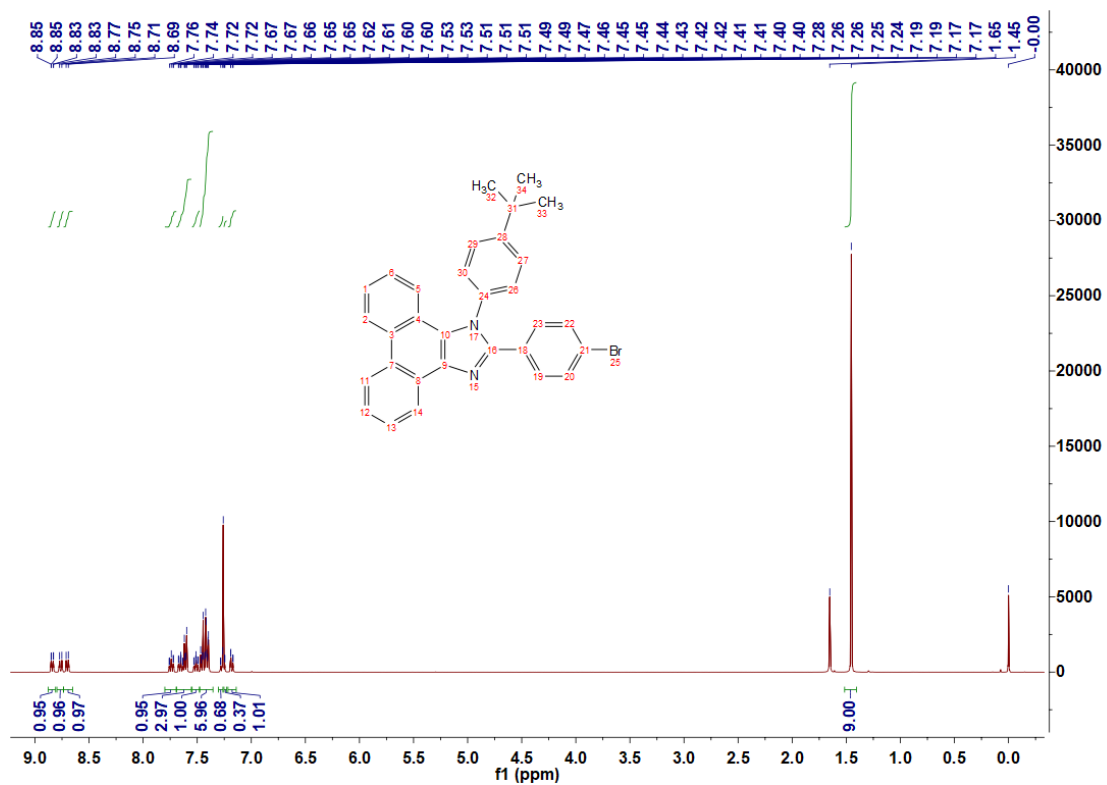

Fig. S9  $^1\text{H}$  NMR spectrum of tPTI-Br conducted in  $\text{CDCl}_3$ .

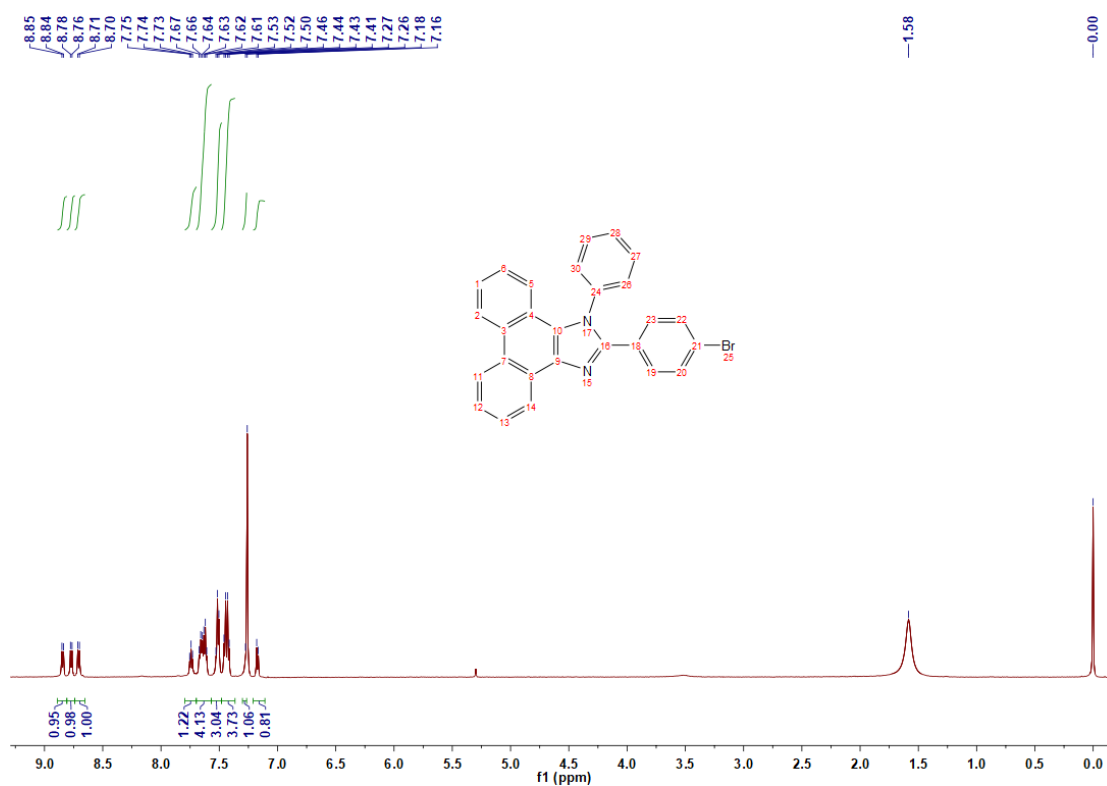

Fig. S10  $^1\text{H}$  NMR spectrum of PTI-Br conducted in  $\text{CDCl}_3$ .

## Compound Spectrum SmartFormula Report

|                      |                                                 |                                       |
|----------------------|-------------------------------------------------|---------------------------------------|
| <b>Analysis Info</b> |                                                 | Acquisition Date 10/5/2019 3:31:10 PM |
| Analysis Name        | D:\Data\other groups\lizhen\YY-1_RA1_01_19900.d |                                       |
| Method               | MS_no column_pos_std.m                          | Operator BDAL@DE                      |
| Sample Name          | YY-1                                            | Instrument compact 8255754.20129      |
| Comment              |                                                 |                                       |

|                              |            |                      |          |                  |           |
|------------------------------|------------|----------------------|----------|------------------|-----------|
| <b>Acquisition Parameter</b> |            |                      |          |                  |           |
| Source Type                  | ESI        | Ion Polarity         | Positive | Set Nebulizer    | 2.0 Bar   |
| Focus                        | Not active | Set Capillary        | 4500 V   | Set Dry Heater   | 200 °C    |
| Scan Begin                   | 50 m/z     | Set End Plate Offset | -500 V   | Set Dry Gas      | 8.0 l/min |
| Scan End                     | 1500 m/z   | Set Charging Voltage | 2000 V   | Set Divert Valve | Waste     |
|                              |            | Set Corona           | 0 nA     | Set APCI Heater  | 0 °C      |

**+MS, 0.3min #17**

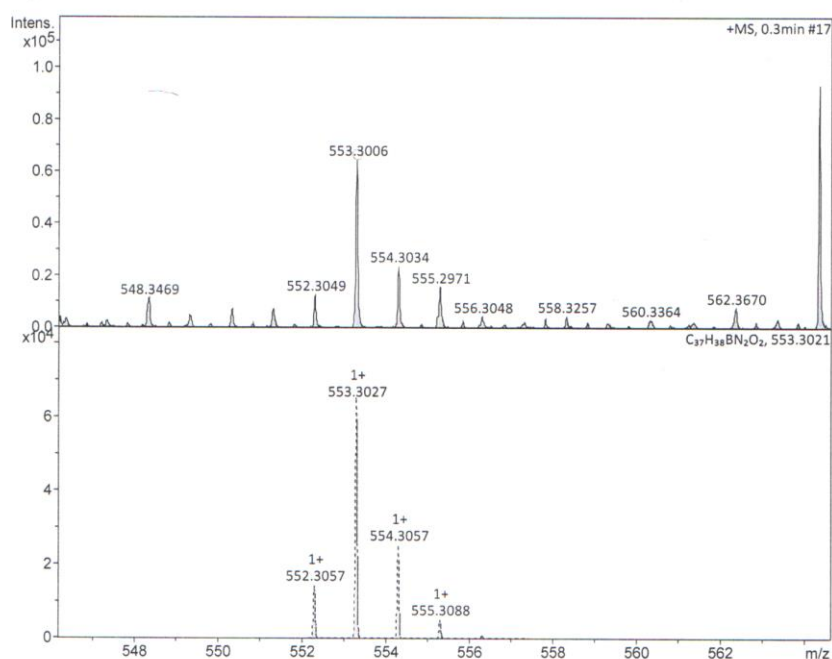

| Meas. m/z  | # | Ion Formula                                                    | Score  | m/z        | err [mDa] | err [ppm] | mSigma | rdb  | e <sup>-</sup> Conf | N-Rule | Adduct |
|------------|---|----------------------------------------------------------------|--------|------------|-----------|-----------|--------|------|---------------------|--------|--------|
| 553.300649 | 1 | C <sub>17</sub> H <sub>18</sub> BN <sub>2</sub> O <sub>2</sub> | 100.00 | 553.302085 | 2.1       | 3.8       | 78.2   | 20.5 | even                | ok     | M+H    |

YY-1\_RA1\_01\_19900.d

Bruker Compass DataAnalysis 4.3

printed: 10/7/2019 7:19:34 PM

by: BDAL@DE

Page 1 of 1

**Fig. S11** HRMS spectrum of tPTI-Bpin.

## Compound Spectrum SmartFormula Report

|                      |                                                 |                                       |                       |
|----------------------|-------------------------------------------------|---------------------------------------|-----------------------|
| <b>Analysis Info</b> |                                                 | Acquisition Date 10/5/2019 3:34:27 PM |                       |
| Analysis Name        | D:\Data\other groups\lizhen\YY-2_RA2_01_19901.d | Operator                              | BDAL@DE               |
| Method               | MS_no column_pos_std.m                          | Instrument                            | compact 8255754.20129 |
| Sample Name          | YY-2                                            |                                       |                       |
| Comment              |                                                 |                                       |                       |

|                              |            |                      |          |                  |           |
|------------------------------|------------|----------------------|----------|------------------|-----------|
| <b>Acquisition Parameter</b> |            |                      |          |                  |           |
| Source Type                  | ESI        | Ion Polarity         | Positive | Set Nebulizer    | 2.0 Bar   |
| Focus                        | Not active | Set Capillary        | 4500 V   | Set Dry Heater   | 200 °C    |
| Scan Begin                   | 50 m/z     | Set End Plate Offset | -500 V   | Set Dry Gas      | 8.0 l/min |
| Scan End                     | 1500 m/z   | Set Charging Voltage | 2000 V   | Set Divert Valve | Waste     |
|                              |            | Set Corona           | 0 nA     | Set APCI Heater  | 0 °C      |

+MS, 0.3-0.4min #14-21

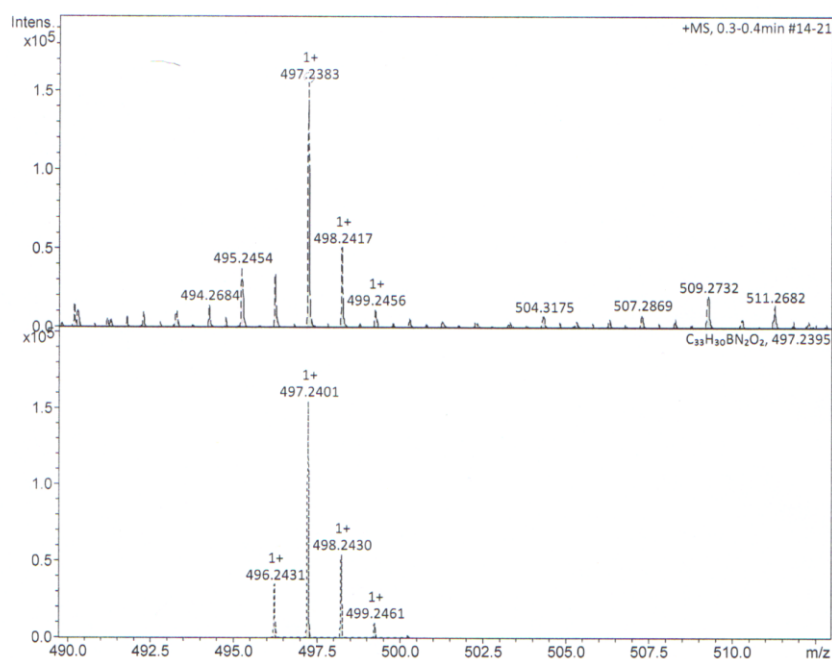

| Meas. m/z  | # | Ion Formula | Score  | m/z        | err [mDa] | err [ppm] | mSigma | rdb  | e <sup>-</sup> Conf | N-Rule | Adduct |
|------------|---|-------------|--------|------------|-----------|-----------|--------|------|---------------------|--------|--------|
| 497.238275 | 1 | C33H30BN2O2 | 100.00 | 497.239485 | 1.8       | 3.6       | 12.6   | 20.5 | even                | ok     | M+H    |

YY-2\_RA2\_01\_19901.d

Bruker Compass DataAnalysis 4.3

printed: 10/7/2019 7:21:19 PM

by: BDAL@DE

Page 1 of 1

**Fig. S12** HRMS spectrum of PTI-Bpin.
